# Supplementary material for: Synthesis, Structure, and Spectral-Luminescent Properties of Peripherally Fluorinated Mg(II) and Zn(II) Octaphenyltetraazaporphyrins
Source: MDPI journal article supplement (doi:10.3390/molecules27238619), 2022-12-06
Supplement: s1 [file s1]

# Supplementary Information

of the article «Synthesis, Structure, and Spectral-Luminescent Properties of Peripherally Fluorinated Mg(II) and Zn(II) Octaphenyltetraazaporphyrins»

Alexey Rusanov<sup>1,2</sup>, Natalya Chizhova<sup>1</sup> and Nugzar Mamardashvili<sup>1\*</sup>

<sup>1</sup>G.A. Krestov Institute of Solution Chemistry of the Russian Academy of Sciences, Russia, 153045, Ivanovo, Akademicheskaya St. 1, <sup>2</sup>Ivanovo State University of Chemistry and Technology Russia, 153460, Ivanovo, Sheremetevsky Pr. 7

\* Correspondence: [nugzarstrasburg@mail.ru](mailto:nugzarstrasburg@mail.ru); Tel.: +7-9038893456

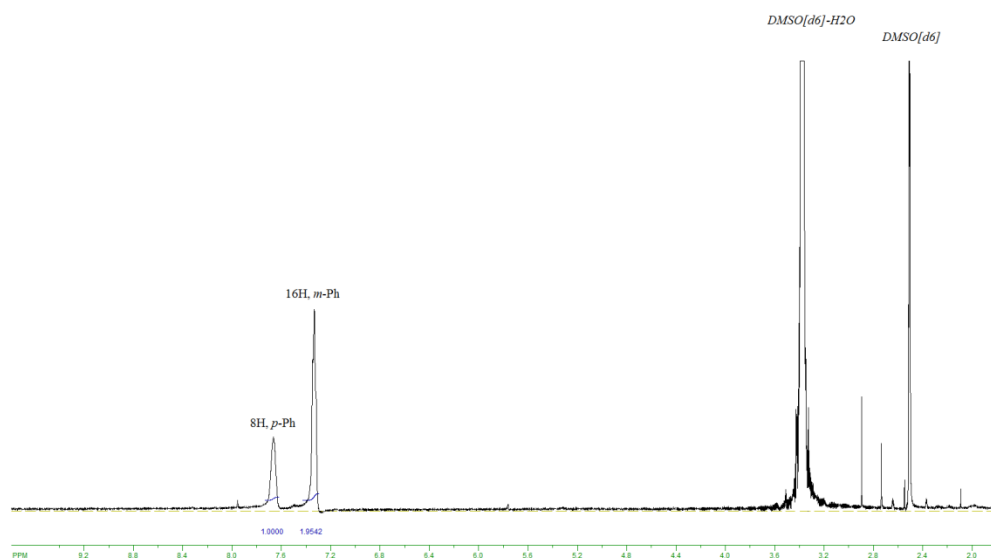

**Figure S1.** <sup>1</sup>H NMR spectrum of the Mg(II)-octa-(2,6-difluorophenyl)tetraazaporphyrin in d<sub>6</sub> DMSO.

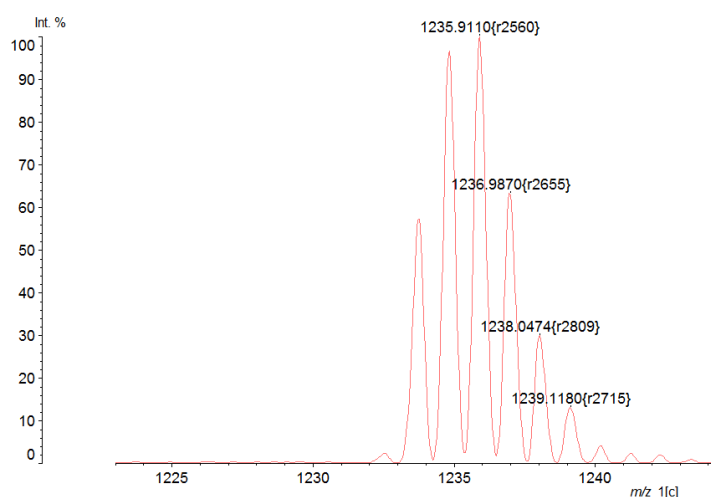

**Figure S2.** The isotopic distribution of the molecular ion peak of Mg(II)-octa-(2,6-difluorophenyl)tetraazaporphyrin.

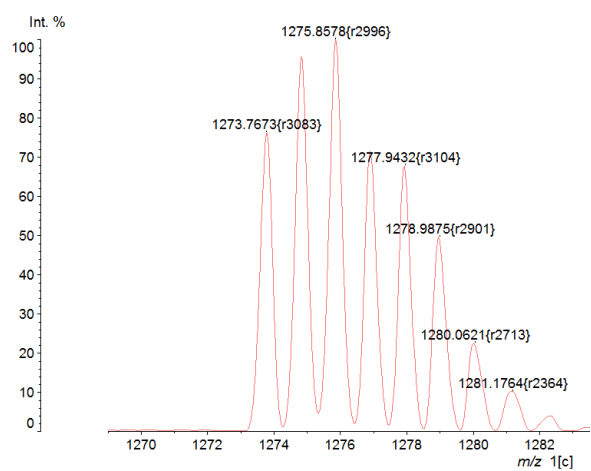

**Figure S3.** The isotopic distribution of the molecular ion peak of Zn(II)-octa-(2,6-difluorophenyl)tetraazaporphyrin.

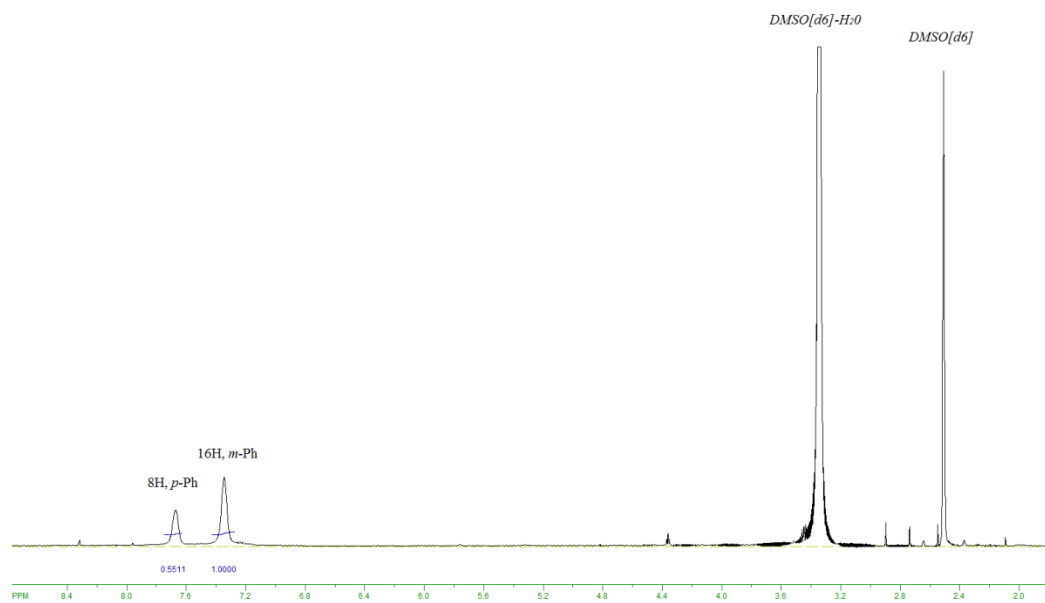

**Figure S4.** <sup>1</sup>H NMR spectrum of the Zn(II)-octa-(2,6-difluorophenyl)tetraazaporphyrin in *d*<sub>6</sub> DMSO.

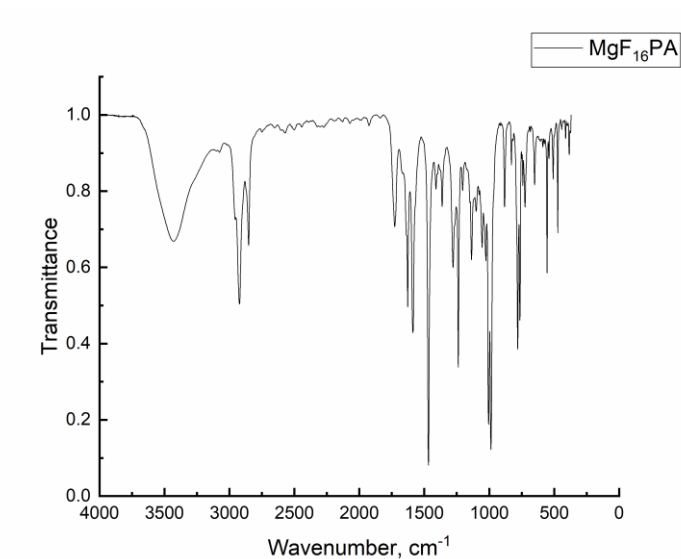

**Figure S5.** IR spectrum of the Mg(II)-octa-(2,6-difluorophenyl)tetraazaporphyrin in KBr tablets.

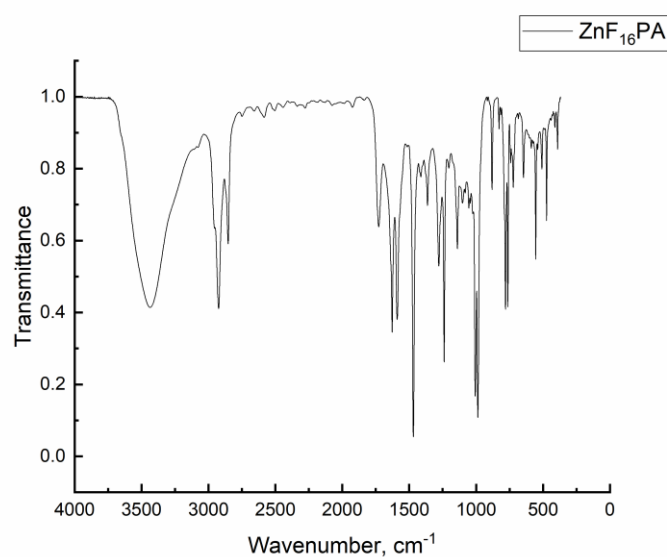

**Figure S6.** IR spectrum of the Zn(II)-octa-(2,6-difluorophenyl)tetraazaporphyrin in KBr tablets.

**Table S1.** The values from visualization of the planarity measure and equations of them.

| Atom      | Values for MgF <sub>16</sub> PA (1) | Values for ZnF <sub>16</sub> PA (2) | Equation 2/1      |
|-----------|-------------------------------------|-------------------------------------|-------------------|
| Metal-ion | 0.000                               | 0.140                               | 0.140 (div. by 0) |
| N         | 0.005                               | 0.012                               | 2.4               |
|           | 0.005                               | 0.015                               | 3                 |
|           | 0.005                               | 0.015                               | 3                 |
|           | 0.005                               | 0.013                               | 2.6               |
| Na        | 0.000                               | 0.014                               | 0.014 (div. by 0) |
|           | 0.000                               | 0.005                               | 0.005(div. by 0)  |

|   |                                                              |                                                              |                                               |
|---|--------------------------------------------------------------|--------------------------------------------------------------|-----------------------------------------------|
|   | 0.000<br>0.000                                               | 0.007<br>0.005                                               | 0.007(div. by 0)<br>0.005(div. by 0)          |
| C | 0.026; 0.008<br>0.008; 0.026<br>0.026; 0.008<br>0.008; 0.026 | 0.014; 0.026<br>0.029; 0.005<br>0.005; 0.029<br>0.026; 0.013 | 0.5; 3.25<br>3.6; 0.2<br>0.2; 3.6<br>3.2; 0.5 |

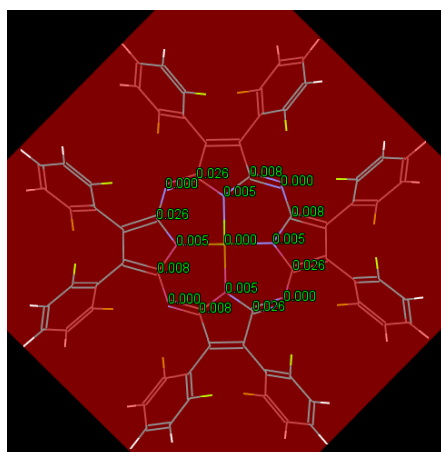

MgF<sub>16</sub>PA

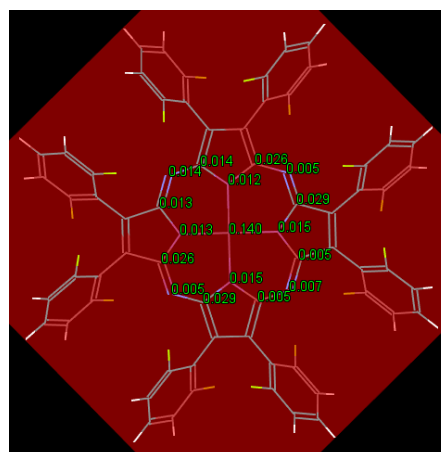

ZnF<sub>16</sub>PA

**Figure S7.** Visualization of the planarity measure of the Mg(II)-octa-(2,6-difluorophenyl)tetraazaporphyrin and Zn(II)-octa-(2,6-difluorophenyl)tetraazaporphyrin.

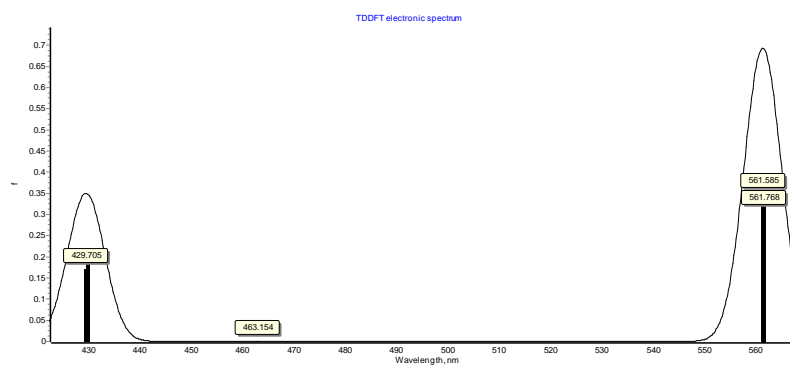

**Figure S8.** Predicted UV-Vis spectrum of the Mg(II)-octa-(2,6-difluorophenyl)tetraazaporphyrin with nstate=10 and root=1 parameters.

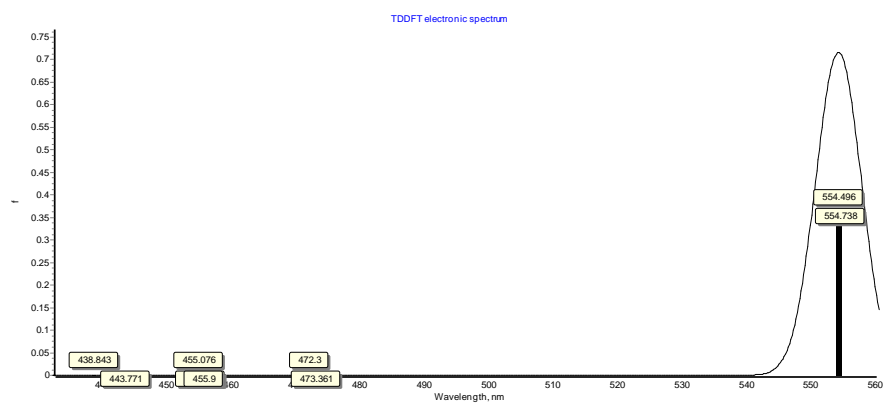

**Figure S9.** Predicted UV-Vis spectrum of the Zn(II)-octa-(2,6-difluorophenyl)tetraazaporphyrin with nstate=10 и root=1 parameters.

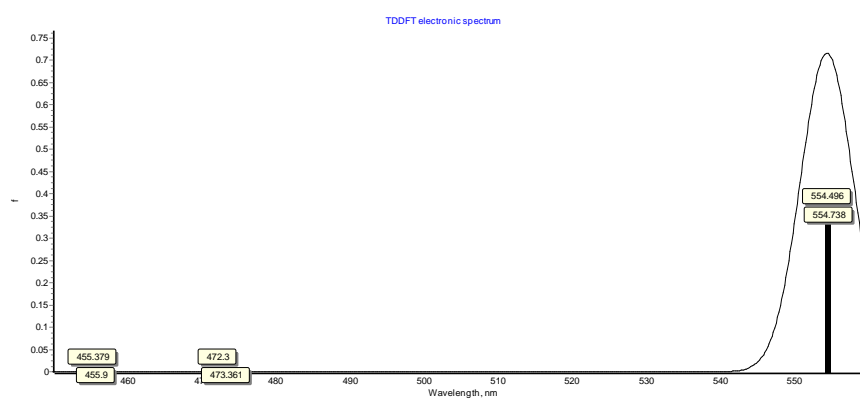

**Figure S10.** Predicted UV-Vis spectrum of the Zn(II)-octa-(2,6-difluorophenyl)tetraazaporphyrin with nstate=6 и root=20 parameters.

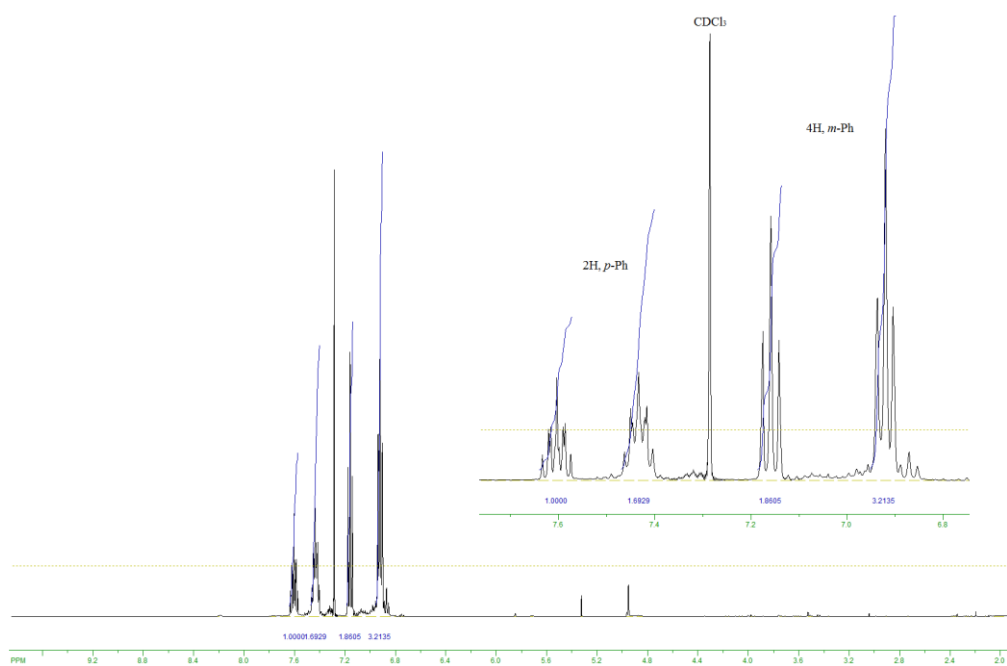

**Figure S11.**  $^1\text{H}$  NMR spectrum of the di-(2,6-difluorophenyl)maleindinitrile in  $\text{CDCl}_3$ .

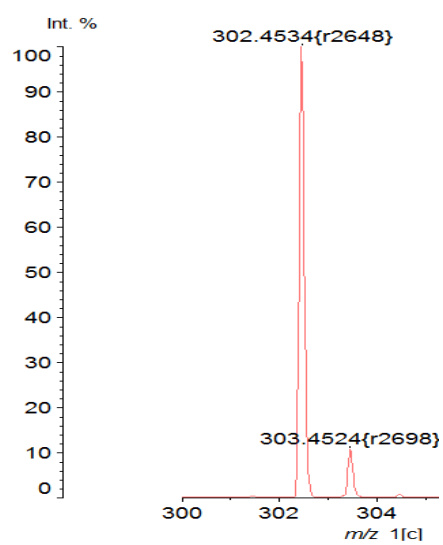

**Figure S12.** Mass-spectrum of the di-(2,6-difluorophenyl)maleindinitrile.
